# Supplementary material for: Targeting pulmonary tumor microenvironment with CXCR4-inhibiting nanocomplex to enhance anti–PD-L1 immunotherapy
Source: PubMed Central journal article supplement — Sci Adv. 2020 May 15;6(20):eaaz9240. doi: 10.1126/sciadv.aaz9240 (PMC7228744; doi:10.1126/sciadv.aaz9240), 2020-05-15
Supplement: aaz9240_SM.pdf [file aaz9240_SM.pdf]

## Supplementary Materials for

### **Targeting pulmonary tumor microenvironment with CXCR4-inhibiting nanocomplex to enhance anti-PD-L1 immunotherapy**

Zhaoting Li, Yixin Wang, Yuexin Shen, Chenggen Qian, David Oupicky\*, Minjie Sun\*

\*Corresponding author. Email: [david.oupicky@unmc.edu](mailto:david.oupicky@unmc.edu) (D.O.); [msun@cpu.edu.cn](mailto:msun@cpu.edu.cn) (M.S.)

Published 15 May 2020, *Sci. Adv.* **6**, eaaz9240 (2020)

DOI: [10.1126/sciadv.aaz9240](https://doi.org/10.1126/sciadv.aaz9240)

#### **This PDF file includes:**

Figs. S1 to S6

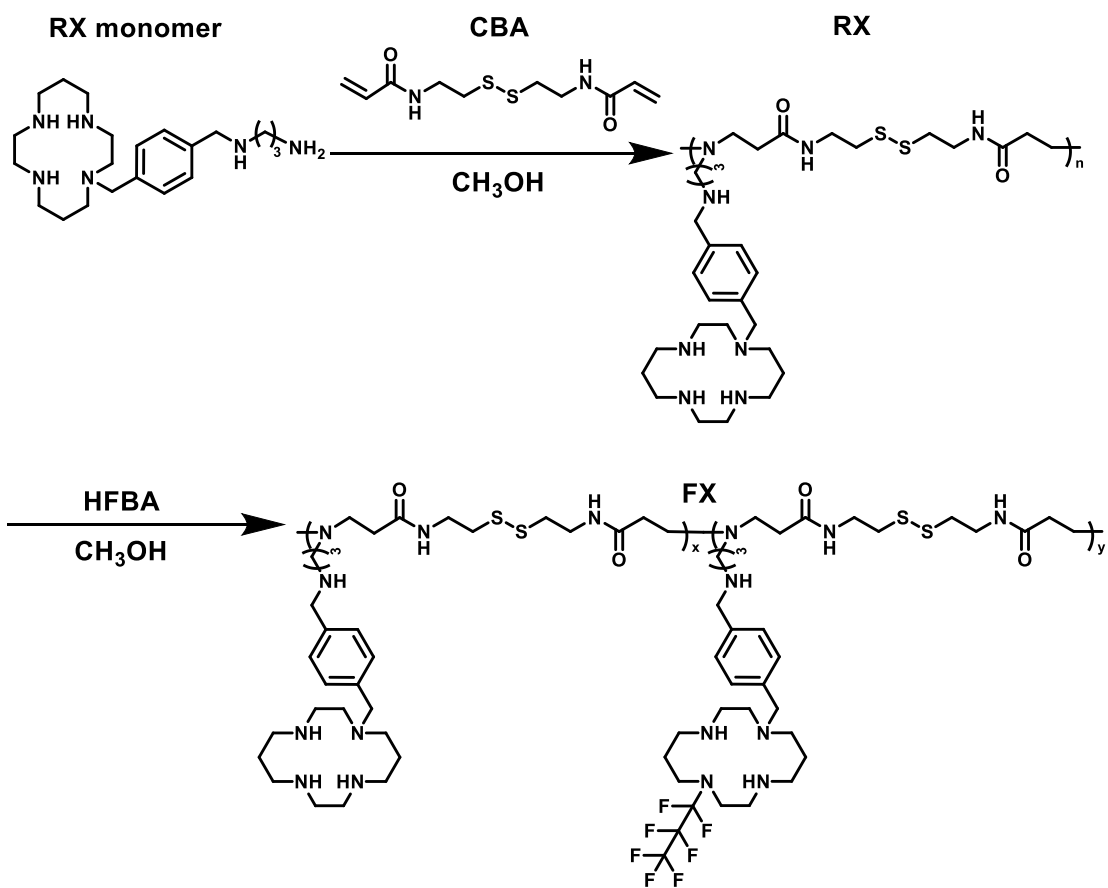

**Fig. S1.** Chemical synthesis of FX.

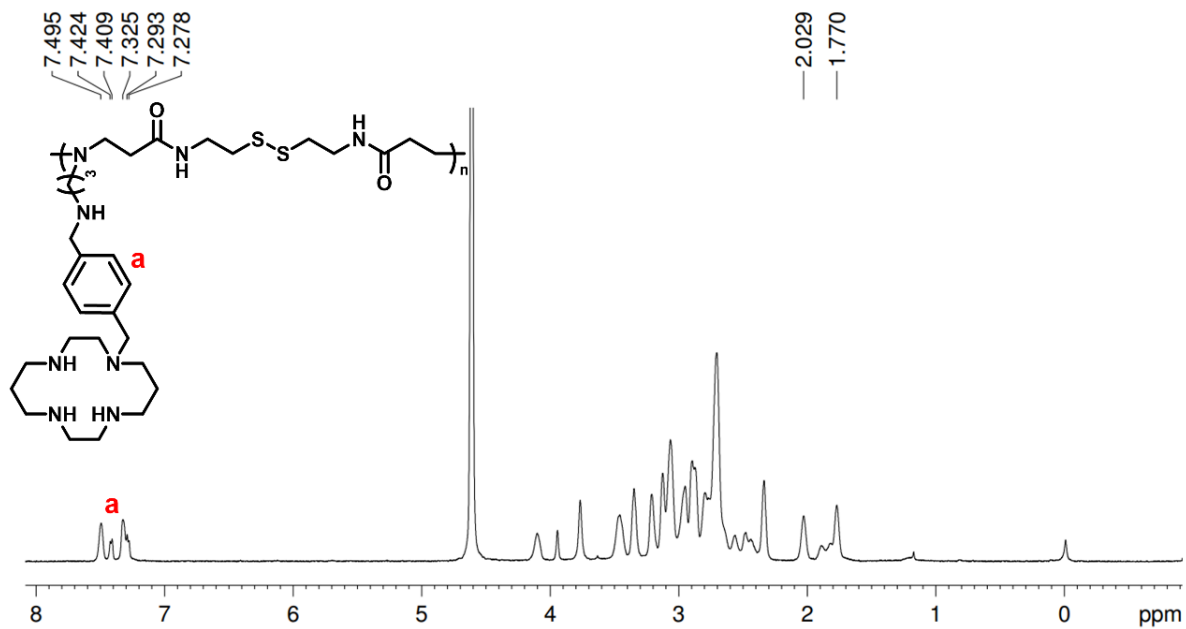

**Fig. S2.**  $^1\text{H}$  NMR spectrum of RX.

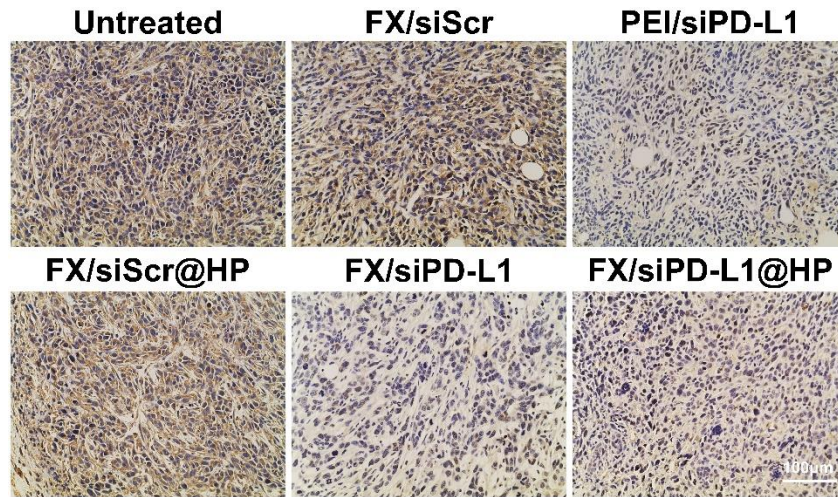

**Fig. S3.** *In vivo* PD-L1 silence determined by immunohistochemistry assay

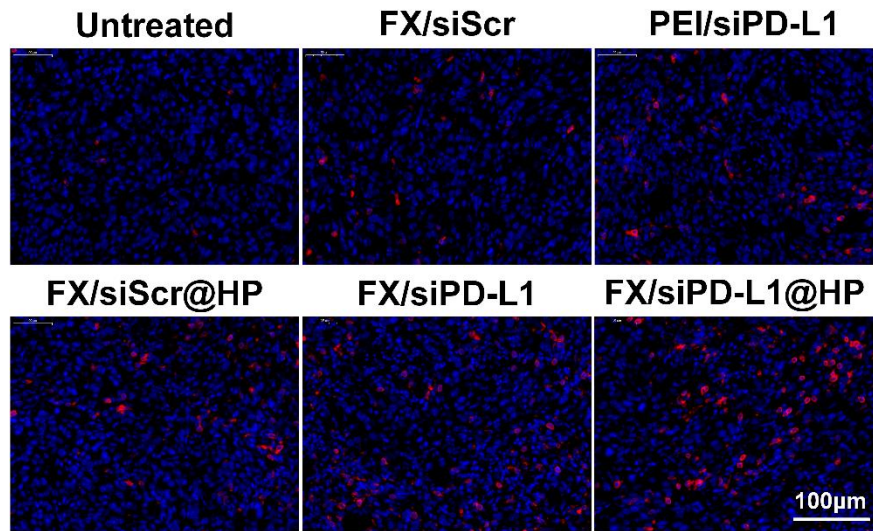

**Fig. S4.** CD8<sup>+</sup> T cells infiltration determined by immunofluorescence assay

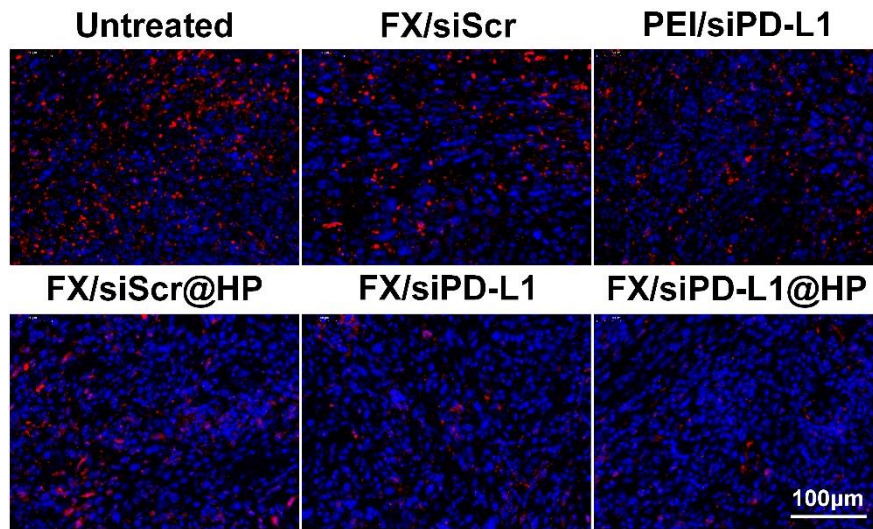

**Fig. S5.** IL-10 expression determined by immunofluorescence assay

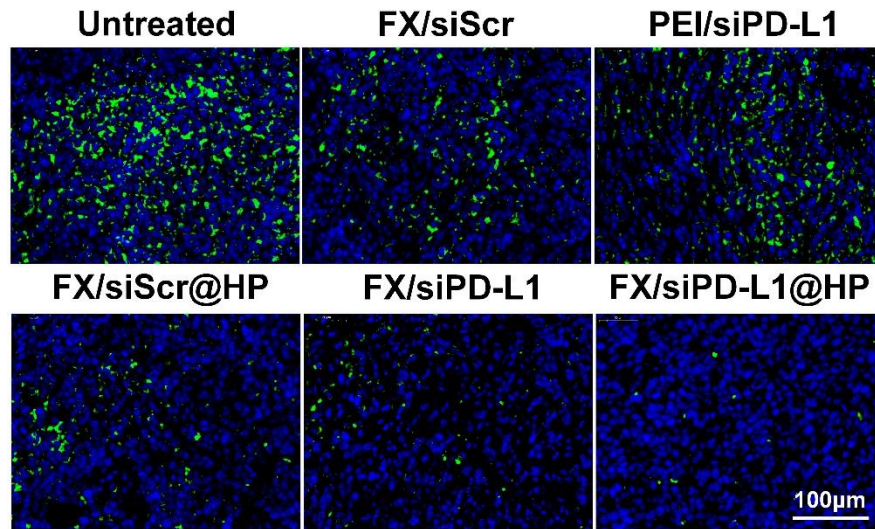

**Fig. S6.** TGF- $\beta$  expression determined by immunofluorescence assay
